# Supplementary material for: Frequency‐dependent functional connectivity in resting state networks
Source: PubMed Central journal article supplement (PMC7670639; doi:10.1002/hbm.25184), 2020-08-25
Supplement: HBM-41-5187-s005.pdf [file HBM-41-5187-s005.pdf]

**Table S1** – For each network, the selected seeds and their coordinates in MNI space are indicated.

| <i>Network name</i>            | <i>Seed name</i>                     | <i>Abbreviation</i> | <i>MNI coordinates</i> |
|--------------------------------|--------------------------------------|---------------------|------------------------|
| <i>Default Mode (DMN)</i>      | Posterior cingulate cortex           | PCC                 | [5, -58, 29]           |
|                                | Medial prefrontal cortex             | MPFC                | [-5, 35, -9]           |
|                                | Left angular gyrus                   | lANG                | [-57, -63, 17]         |
|                                | Right angular gyrus                  | rANG                | [56,-63,18]            |
| <i>Dorsal Attention (DAN)</i>  | Left Frontal Eye Field               | lFEF                | [-30,-9,52]            |
|                                | Right Frontal Eye Field              | rFEF                | [30,-9,55]             |
|                                | Left Inferior Parietal Sulcus        | lIPS                | [-27,-61,50]           |
|                                | Right Inferior Parietal Sulcus       | rIPS                | [26,-60,48]            |
| <i>Ventral Attention (VAN)</i> | Right Temporo-Parietal Junction      | rTPJ                | [60, -43, 16]          |
|                                | Right Inferior Frontal Gyrus         | rIFG                | [42,5,1]               |
| <i>Language (LAN)</i>          | Left Temporo-Parietal Junction       | lTPJ                | [-54, -33, -4]         |
|                                | Left Inferior Frontal Gyrus          | lIFG                | [-47, 14, 1]           |
| <i>Somatomotor (SMN)</i>       | Left Supplementary Motor Area        | lSMA                | [-1,-17,55]            |
|                                | Left Primary Somatosensory Cortex    | lS1                 | [-45,-17,49]           |
|                                | Right Primary Somatosensory Cortex   | rS1                 | [45,-17,49]            |
|                                | Left Secondary Somatosensory Cortex  | lS2                 | [-42,-13,10]           |
|                                | Right Secondary Somatosensory Cortex | rS2                 | [42,-13,10]            |
| <i>Visual (VN)</i>             | Left human ventral Visual 4 area     | lV4v                | [-27,-81,-13]          |
|                                | Right human ventral Visual 4 area    | rV4v                | [27,-81,-13]           |
|                                | Left dorsal Visual 2 area            | lV2d                | [-45,-81,4]            |
|                                | Right dorsal Visual 2 area           | rV2d                | [45,-81,4]             |
